# Supplementary material
Source: publisher site journal article supplement (https://www.dovepress.com/article/464508)
Supplement: Supplementary file 1 [file get_supplementary_file.php]

**Table S1** GC-MS/MS quantification and confirmation ions used for *Viscum album* lipophilic extract (VALE) analysis by selected reaction monitoring (SRM) mode.


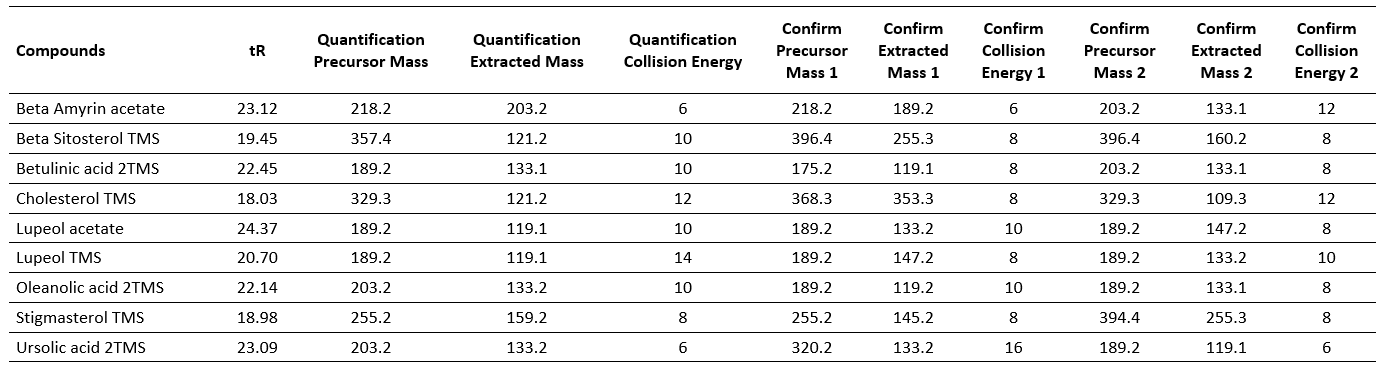


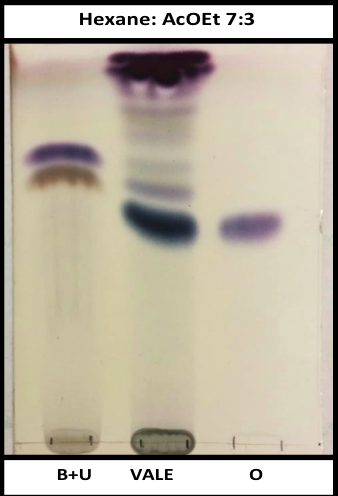


**Figure S1** Thin layer chromatography obtained with the reference compounds and VALE sample. AcOEt= ethyl acetate; B+U= betulinic and ursolic acid standard; O= oleanolic acid standard.

**Table S2** Required HLB for TCM oil (medium-chain trglycerides) and weight fraction of Smix (TWEEN 80®/SPAN 80®) applied for O/W emulsions.

| **Required HLB (MTC)** | **TWEEN 80 (%)** | **SPAN 80 (%)** |
| --- | --- | --- |
| 8 | 5.19 | 9.81 |
| 9 | 6.59 | 8.41 |
| 10 | 7.99 | 7.01 |
| 11 | 9.39 | 5.61 |
| 12 | 10.79 | 4.21 |
| 13 | 12.20 | 2.80 |
| 14 | 13.60 | 1.40 |
| 15 | 15 | - |

**Figure S2** Visual appearance obtained from the HLB study of systems containing MCT (medium- chain triglycerides) and Smix (TWEEN 80®/SPAN 80®) after 24h of titration.
